# CLINICAL REVIEW: Identifying Children at Risk for Polycystic Ovary Syndrome

Robert L. Rosenfield

*The University of Chicago Pritzker School of Medicine, Departments of Pediatrics and Medicine, Section of Pediatric Endocrinology, The University of Chicago Comer Children's Hospital, Chicago, Illinois 60637*

**Context:** Polycystic ovary syndrome (PCOS) appears to arise as a complex trait with contributions from both heritable and nonheritable factors. Polygenic influences appear to account for about 70% of the variance in pathogenesis. In view of this evidence for congenital contributions to the syndrome, childhood manifestations may be expected.

**Objective:** The objective has been to review the evidence that risk factors for PCOS can be recognized in childhood.

**Design:** This study consisted of screening of the PCOS literature for articles pertaining to potential childhood and adolescent antecedents.

**Results:** Congenital virilizing disorders; above average or low birth weight for gestational age; premature adrenarche, particularly ex-

aggerated adrenarche; atypical sexual precocity; or intractable obesity with acanthosis nigricans, metabolic syndrome, and pseudo-Cushing syndrome or pseudo-acromegaly in early childhood have been identified as independent prepubertal risk factors for the development of PCOS. During adolescence, PCOS may masquerade as physiological adolescent anovulation. Asymptomatic adolescents with a polycystic ovary occasionally (8%) have subclinical PCOS but often (42%) have a subclinical PCOS type of ovarian dysfunction, the prognosis for which is unclear.

**Conclusion:** Identifying children at risk for PCOS offers the prospect of eventually preventing some of the long-term complications associated with this syndrome once our understanding of the basis of the disorder improves. (*J Clin Endocrinol Metab* 92: 787–796, 2007)

**P**OLYCYSTIC OVARY SYNDROME (PCOS) becomes symptomatic during adolescence and affects at least 5% of reproductive-age women (1). PCOS is a heterogeneous syndrome of unexplained chronic hyperandrogenism and oligo-anovulation (2), with a polycystic ovary being an alternative diagnostic criterion (3). About half of cases lack some of the classic Stein-Leventhal syndrome features of menstrual irregularity, hirsutism, obesity, and polycystic ovaries. Whether the syndrome can be diagnosed in the absence of hyperandrogenism is controversial (4, 5), and the documentation of hyperandrogenemia can be problematic (5). The broad spectrum of the disorder seems to encompass atypical cases of hyperandrogenemia with central obesity and features of insulin resistance instead of hirsutism or anovulation (6).

Functional ovarian hyperandrogenism (FOH) is usually the source of the androgen excess (7, 8). It is characterized by 17-hydroxyprogesterone (17PROG) hyperresponsiveness to the gonadotropin stimulation of GnRH agonist or human chorionic gonadotropin testing and subnormal suppressibility of plasma testosterone upon adrenal suppression by glucocorticoid. It is often accompanied by functional adrenal hyperandrogenism, characterized by 17-hydroxypreg-

nenolone or dehydroepiandrosterone (DHEA) hyperresponsiveness to ACTH; in atypical PCOS, the sole source of androgen excess may be functional adrenal hyperandrogenism. The underlying defect seems to be a constitutive dysregulation of steroidogenic cells (9). Intrinsic granulosa cell dysfunction is also present (8, 10, 11). LH excess appears to contribute to 50–75% of cases (12, 13). Evidence is accumulating that it arises from androgen interfering with the progesterone negative-feedback effect on LH secretion (14, 15). However, the possibility of primary central mechanisms for LH excess remains, particularly in adolescent PCOS (16–18).

Increasing evidence suggests that PCOS arises as a complex trait with contributions from both heritable and nonheritable factors (19–21). Polygenic influences appear to account for about 70% of the variance in pathogenesis. Nearly half of sisters of women with PCOS have an elevated plasma testosterone level, although only half of them are symptomatic. Polycystic ovaries appear to be transmitted as a dominant trait, usually asymptomatic but often accompanied by a subclinical PCOS type of ovarian dysfunction (22). Central obesity and insulin resistance seem to play important roles in PCOS (23, 24), perhaps by accentuating steroidogenic dysregulation (7, 8) but perhaps more fundamentally because PCOS is closely related to these features in parents (25). Gestational factors have also been incriminated; the syndrome has been associated with high birth weight in heavy mothers (26) and can arise from fetal programming by androgen excess (27). In view of these indications for congenital origins of the syndrome, it is not surprising that there is increasing recognition of risk factors for PCOS in childhood (Fig. 1), the evidence for which is reviewed here.

First Published Online December 19, 2006

Abbreviations: CAH, Congenital adrenal hyperplasia; CPP, central precocious puberty; DHEA, dehydroepiandrosterone; DHEA-S, DHEA sulfate; FOH, functional ovarian hyperandrogenism; LBW, low birth weight for gestational age; PAA, physiological adolescent anovulation; PCOS, polycystic ovary syndrome; 17PROG, 17-hydroxyprogesterone; SGA, subnormal birth weight for gestational age.

JCEM is published monthly by The Endocrine Society (<http://www.endo-society.org>), the foremost professional society serving the endocrine community.

**Congenital Virilization Programs PCOS Neuroendocrine and Metabolic Features**

PCOS is common in females with congenital virilizing disorders (17, 18). Congenital adrenal hyperplasia (CAH) is the most frequent, but not exclusive, cause of this outcome. The diagnosis of PCOS is established in CAH by finding persistent elevation of testosterone when anovulatory symptoms persist in women in whom the adrenal dysfunction of CAH is well controlled on glucocorticoid therapy. It seems to be present in about half of women with classic CAH but occurs in only perhaps one fifth of women with nonclassic CAH. The PCOS of CAH is associated with a higher degree of LH hyperresponsiveness to GnRH agonist testing than found in ordinary PCOS. It has been suggested that the LH hyperresponsiveness to GnRH may distinguish this secondary PCOS from the LH-dependent adrenal rests that rarely occur in CAH (17, 28). Insulin resistance has been reported in nonobese females with nonclassic CAH before initiating glucocorticoid therapy (29).

The ascertainment of ovarian hyperandrogenism may be difficult. On one hand, undertreatment of virilizing CAH mimics PCOS by causing polycystic ovaries (30-32), elevated LH levels (33, 34), and infertility (33, 35). On the other hand, glucocorticoid overtreatment also causes amenorrhea (36). The diagnosis may require ovarian function testing.

Congenital androgenization has recently been recognized in mice, sheep, and monkeys as interfering with the negative-feedback inhibition of LH release by progesterone (27, 37, 38). Studies in the rhesus monkey exposed to androgen excess early in gestation have been particularly informative, showing classic PCOS features (27, 39); these animals have ovarian and adrenal hyperandrogenism, oligomenorrhea, polyfollicular ovaries, and elevated LH levels. They also have abdominal obesity, insulin resistance, impaired glucose tolerance, and dyslipidemia. Embryogenesis is impaired. Although low birth weight is not found in these monkeys, it is found in prenatally androgenized sheep (38). Androgen exposure later in gestation causes a similar picture except for LH and insulin disturbances. These considerations would seem to predict that prenatal treatment of affected female fetuses would not only improve genital anatomy but would also improve adult reproductive function.

An intriguing implication of these studies is that excessive

testosterone secretion from the ovary of a fetus destined to develop PCOS may program many facets of the syndrome. PCOS theca cells are known to constitutively overproduce androgen (9). Theca-interstitial cells of the fetal primordial follicle begin forming androstenedione and DHEA as early as 3 months in humans, well before antral follicle development begins (40). An alternate possibility that the fetus is exposed to increased maternal testosterone during PCOS pregnancy (41) remains to be confirmed using a testosterone assay appropriately specific for pregnancy serum (42). Thus, although the fetal PCOS ovary potentially overproduces androgen, the question remains whether the quantity would be sufficient to contribute substantially to the fetal endocrine milieu.

**Premature Adrenarche and Premature Pubarche**

*Definitions and background*

Adrenarche, the adrenal puberty, is the maturational increase in adrenal androgen production. It reflects the development of the adrenocortical zona reticularis, which becomes continuous at about 6 yr of age and enlarges steadily over the subsequent decade (43, 44).

DHEA sulfate (DHEA-S), is the predominant marker for adrenarche (45-48). Adrenarche represents a change in the pattern of adrenocortical secretory response to ACTH, characterized by disproportionately increasing responsiveness of  $\Delta^5$ -steroid intermediates (17-hydroxypregnenolone and DHEA) compared with  $\Delta^4$ -steroids (e.g. 17PROG and androstenedione) in the presence of stable responses of cortisol (46, 49). This pattern of adrenal secretion results from a unique enzyme expression profile in the zona reticularis, the cells of which express low  $3\beta$ -hydroxysteroid dehydrogenase type 2 but high cytochrome b5 (an enhancer of the 17,20-lyase activity of cytochrome P450c17) and steroid sulfotransferase (SULT2A1) activities (44) (Fig. 2).

Zona reticularis development requires ACTH, but its determinants are otherwise poorly understood. Another unidentified specific pituitary factor is likely to be involved (50). Adrenarche is not directly related to the pubertal maturation of the neuroendocrine-gonadotropin-gonadal axis. Adiposity may play a role in its development (51, 52). Leptin, insulin, and IGF-I are candidate mediators of this effect (44, 53, 54).

Pubarche, the appearance of sexual hair, requires adren-

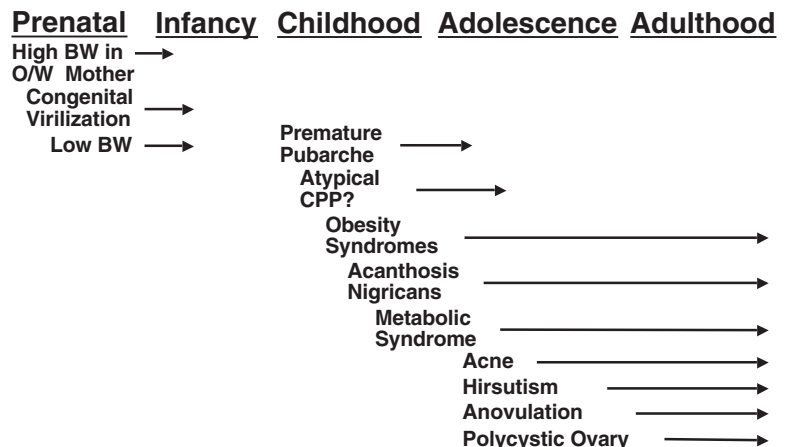

FIG. 1. Childhood risk factors for PCOS. The clinical presentations are listed below the developmental stages in which they first appear, and the arrows indicate duration of the symptoms. BW, Birth weight; O/W, over-average weight. Modified with permission from Buggs and Rosenfield (6).

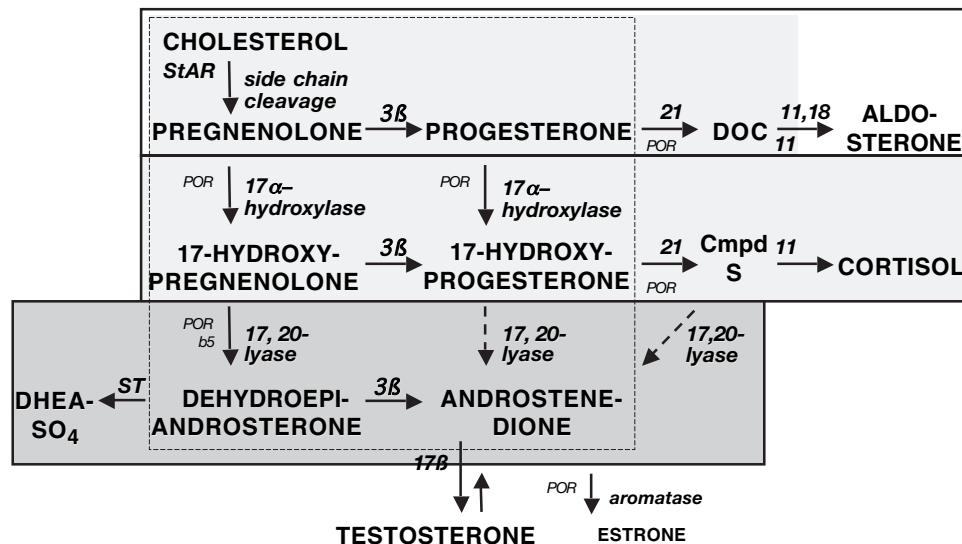

FIG. 2. Outline of the organization of the major steroid biosynthetic pathways in the adrenal cortex. The area within the *dotted square* contains the core steroidogenic pathways, of which the *left column* shows the  $\Delta^5$ -pathway and the *right column* the  $\Delta^4$ -pathway, also used by ovarian theca cells. The *top row* shows the pathway to aldosterone; the *middle row* shows the zona fasciculata pathway to cortisol. The *lower, darkly shaded row* shows the zona reticularis steps to DHEA-S ( $\text{SO}_4$ ) and other 17-ketosteroids. *Dotted pathways* are considered to be relatively minor. Compound (Cmpd) S is 11-deoxycortisol; the 11-deoxy intermediate to aldosterone (deoxycorticosterone) is not shown. The steroidogenic enzymes are *italicized*. Cytochrome P450 enzyme steps are side chain cleavage (*sc*), 17 $\alpha$ -hydroxylase/17,20-lyase, 21-hydroxylase (21), 11 $\beta$ -hydroxylase/18-hydroxylase-dehydrogenase (11, 18), and aromatase. Non-P450 enzyme steps are steroidogenic acute regulatory protein (*StAR*),  $\Delta^5$ -isomerase-3 $\beta$ -hydroxysteroid dehydrogenase (3 $\beta$ ), 17 $\beta$ -hydroxysteroid dehydrogenase (17 $\beta$ ), and sulfotransferase (*ST*). Clinically relevant electron transfer enzymes are P450 oxidoreductase (*POR*) and cytochrome b5 (*b5*).

archeal levels of androgen but typically does not occur until shortly after the estrogen rise of true puberty (55). Premature pubarche refers to isolated pubarche before the age of 8 yr in girls (before 9 yr of age in boys) and traditionally has been considered an extreme variation of normal (56). It is ordinarily not accompanied by any other signs of puberty, other than possibly an increase in axillary body odor and microcomedonal acne. Sexual hair development increases slowly, and the bone age increases in proportion to linear growth. Because the pilosebaceous unit sensitivity to androgen is highly variable (57, 58), pubarche may occur at androgen levels that range from those of a young child (idiopathic premature pubarche) to elevated.

Premature adrenarche is the term applied to otherwise unexplained premature pubarche with a plasma steroid pattern indicative of adrenarche (Table 1) ([www.esoterix.com](http://www.esoterix.com)) (43, 47, 57, 59, 60). This is traditionally indicated by a DHEA-S level above 40  $\mu\text{g}/\text{dl}$ , which is above normal for 1- to 5-yr-olds and above average for 6- to 8-yr-olds although within normal limits for early puberty (57). It is accompanied by an above-average DHEA level and minimal if any elevation of other androgens. The plasma steroid responses to ACTH parallel these changes, with rises of 17-hydroxypregnenolone and DHEA predominating. Corresponding to the trend of androgen levels, children who have premature adrenarche tend to have an above-average but normal growth rate and bone age. It is unclear whether premature adrenarche is simply due to advanced onset of normal zona reticularis development or an early manifestation of the zona reticularis overactivity that is the first manifestation of persistent functional adrenal hyperandrogenism.

Exaggerated adrenarche is a clinically extreme type of

premature adrenarche that seems to place children at increased risk for PCOS and its associated features (56, 61, 62). The term originated as a hypothesis for the functional adrenal hyperandrogenism of adults with PCOS (59, 63) that now appears to be due to the dysregulatory hyperandrogenism that involves the ovaries as well (64). Thus, the exaggerated adrenarche of childhood may be the first manifestation of steroidogenic dysregulation, rather than simply being an extreme variant of normal adrenarche.

The term exaggerated adrenarche has been variously applied when the baseline DHEA-S or androstenedione level is over a critical level (61) or elevated for age (65) or when baseline plasma androgens (62) or the response to ACTH of 17-hydroxypregnenolone (66) is above that of early pubertal girls. We suspect this diagnosis in children with premature adrenarche who have clinical features that suggest an atypical degree of androgen excess (*e.g.* significant bone age advancement) or insulin resistance (*e.g.* central adiposity or acanthosis nigricans). Such children generally have a slightly advanced onset of true puberty; compromised height potential is uncommon unless there is a congenital or hereditary reason for short stature (67).

#### *Evidence for a relationship of premature adrenarche to PCOS*

A change in the traditional benign view of premature pubarche occurred with the 1993 report by Ibañez *et al.* (61) that many girls with premature adrenarche went on to develop PCOS during adolescence. Thirty-five postmenarcheal girls with a history of premature pubarche were recalled at an average age of 15–16 yr. Sixteen fulfilled criteria for PCOS, with oligomenorrhea, hirsutism, and elevated androgen lev-

**TABLE 1.** Typical ranges expected for serum androgens and steroid precursors in normal females and premature adrenarache

|                                                                                      | 17PREG<br>(ng/dl)      | 17PROG<br>(ng/dl)      | 11-Deoxycortisol<br>(ng/dl) | Cortisol<br>( $\mu$ g/dl)    | DHEA-S<br>( $\mu$ g/dl)      | DHEA<br>(ng/dl)        | Androstenedione<br>(ng/dl) | Testosterone<br>(ng/dl) |
|--------------------------------------------------------------------------------------|------------------------|------------------------|-----------------------------|------------------------------|------------------------------|------------------------|----------------------------|-------------------------|
| Before ACTH (0800 h)                                                                 |                        |                        |                             |                              |                              |                        |                            |                         |
| Children, 1-5 yr old                                                                 | 10-105                 | 5-115                  | 20-160                      | 3-20                         | 5-35                         | 20-130                 | 10-50                      | <20                     |
| Children, 6-10 yr old                                                                | 10-200                 | 5-115                  | 20-160                      | 3-20                         | 10-115                       | 20-345                 | 10-75                      | <20                     |
| Premature adrenarache                                                                | 20-350                 | 5-115                  | 20-160                      | 3-20                         | 40-130                       | 50-600                 | 20-75                      | 10-35                   |
| Early pubertal girls                                                                 | 35-350                 | 15-220                 | 20-160                      | 3-20                         | 35-130                       | 40-600                 | 40-175                     | 10-35                   |
| Adult females,<br>follicular phase                                                   | 55-360                 | 15-150 <sup>a</sup>    | 20-160                      | 3-20                         | 75-255                       | 100-850                | 60-200                     | 20-60                   |
| After ACTH <sub>1-24</sub> (30-60<br>min after $\geq 10 \mu$ g/m <sup>2</sup><br>iv) |                        |                        |                             |                              |                              |                        |                            |                         |
| Children, 1-5 yr old                                                                 | 45-350                 | 50-270                 | 95-300                      | 17-45                        | 5-35                         | 25-100                 | 15-70                      | <20                     |
| Children, 6-10 yr old                                                                | 60-650                 | 85-300                 | 95-300                      | 17-45                        | 10-115                       | 70-320                 | 25-100                     | <20                     |
| Premature adrenarache                                                                | 80-750                 | 85-400                 | 95-300                      | 17-45                        | 40-130                       | 80-725                 | 25-230                     | 10-35                   |
| Early pubertal girls                                                                 | 150-750                | 90-400                 | 95-300                      | 17-45                        | 35-130                       | 70-725                 | 55-230                     | 10-35                   |
| Adult females,<br>follicular phase                                                   | 150-1070               | 35-160 <sup>a</sup>    | 95-300                      | 17-45                        | 75-255                       | 250-1470               | 60-250                     | 20-60                   |
| Conversion multipliers to<br>SI units                                                | 0.0316<br>(nmol/liter) | 0.0303<br>(nmol/liter) | 0.0289<br>(nmol/liter)      | 0.0276<br>( $\mu$ mol/liter) | 0.0271<br>( $\mu$ mol/liter) | 0.0347<br>(nmol/liter) | 0.0349<br>(nmol/liter)     | 0.0347<br>(nmol/liter)  |

Ranges are for RIA after preparatory chromatography, except for cortisol and DHEA-S. Values differ slightly among laboratories. 17PREG, 17-hydroxypregnenolone. Data are from Esoterix Laboratory Services, Inc. (www.esoterix.com and Steroid Response to ACTH Handbook, 1991) and Refs. 43, 47, 57, 59, and 60.

<sup>a</sup> 17PROG early and midfollicular phase baseline levels greater than 140 ng/dl are found in normal women who are heterozygous for 21-hydroxylase deficiency, and they often have responses to ACTH greater than those shown. 17PROG begins rising in the preovulatory phase and peaks as high as 400 ng/dl in the luteal phase of the cycle.

els; half had a polycystic ovary. The other nineteen were regularly menstruating; one third of these had mild hirsutism, and one sixth had a polycystic ovary. Twelve normal volunteers were studied for comparison. None were obese. A GnRH agonist test showed FOH in all of the PCOS group, with significant LH hyperresponsiveness, but there was no evidence of FOH in the other group of former premature pubarche patients. A retrospective analysis showed significant correlations between their mid-childhood DHEA-S and androstenedione levels and their postpubertal 17PROG responses to GnRH agonist testing (Fig. 3). A DHEA-S level over 185  $\mu$ g/dl (5  $\mu$ mol/liter) at pubarche onset appeared to have both a positive and negative predictive value for PCOS of about two thirds. An androstenedione level over 99 ng/dl (3 nmol/liter), in an assay that did not use preparatory chromatography, appeared to have a positive predictive value over 90% and a negative predictive value of about two thirds. These levels approximate the upper quartile of their overall premature pubarche population (43) and are atypically high for premature adrenarache (Table 1).

This correlation between androgen levels at the time of presentation with premature pubarche and the development of the PCOS type of ovarian dysfunction during adolescence is compatible with the concept that the ovarian and adrenal dysfunction of PCOS represent an inborn dysregulation of steroidogenesis. Two children had 17PROG responses to ACTH upon presentation for premature pubarche that were similar to those sometimes seen in the functional adrenal hyperandrogenism of adult PCOS (7). These data further suggest that children with the exaggerated adrenarache type of premature adrenarache are those at greatest risk of PCOS.

This investigative team subsequently carried out a series of studies in their Catalan (Northern Spanish) population. Ovarian function testing was performed on 76 premature adrenarache girls when they became pubertal (68). In premenarcheal girls averaging 12 yr and postmenarcheal girls averaging 15.4 yr of age, 17-hydroxypregnenolone responses to GnRH agonist tests were strikingly higher than 17PROG responses. Indeed, this postmenarcheal group did not have FOH. The investigators interpreted the data to indicate that

**FIG. 3.** Relationship of androstenedione and DHEA-S blood levels at presentation with premature pubarche to the 17PROG response to GnRH agonist (GnRHag) testing of the same girls when postmenarcheal. PCOS subjects were hyperandrogenic and oligomenorrheic. Modified with permission from Ibañez *et al.* (61).

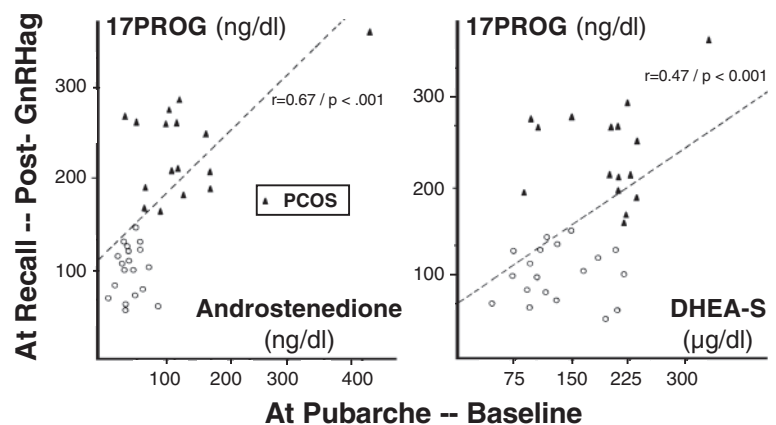

pubertal girls with a history of premature pubarche show a distinct pattern of ovarian maturation that is initially characterized by abnormalities in the  $\Delta^5$  pathway (17-hydroxypregnenolone) and only later by abnormalities in the  $\Delta^4$  pathway (17PROG). Such an unprecedented shift in steroidogenic pathway seems more likely, however, to be attributable to the coexistent functional adrenal hyperandrogenic responses to a stressful research protocol.

In another set of studies, Ibañez *et al.* (69, 70) reported that, as in PCOS, premature pubarche girls were excessively insulin resistant from mid-childhood through puberty. This was associated with central adiposity and dyslipidemia but not obesity (71). Other populations of premature pubarche girls have been reported to be insulin resistant and obese, with a correlation between insulin resistance and androgen levels (72).

The type of longitudinal studies reported by the Ibañez team is very difficult to carry out. As yet, only one report of an attempt to replicate these findings has appeared. A Parisian collaborative group identified Caucasian former premature pubarche patients with no hormone abnormality who were postpubertal (73). One third could be studied, and at an average age of 17.4 yr, these 27 patients had a higher free androgen index and lower SHBG than 25 population controls. On the other hand, they did not differ from controls in hirsutism score, acne, prevalence of menstrual irregularity, BMI, or glucose and insulin during an oral glucose tolerance test. The investigators concluded that only 15–20% of their premature pubarche population developed hyperandrogenism. Their study did not clarify whether the subgroup of girls with exaggerated adrenarche is at increased risk of developing PCOS.

#### *Low-birth-weight risk for premature adrenarche and PCOS*

A low birth weight for gestational age (LBW) was meanwhile recognized to predispose to premature pubarche and, in turn, PCOS by Ibañez *et al.* in their Catalan population (65). Girls with premature pubarche associated with elevated DHEA-S or androstenedione levels (averaging 120  $\mu\text{g}/\text{dl}$  and 141  $\text{ng}/\text{dl}$ , respectively) had lower birth weights for gestational age than clinic controls according to a retrospective comparison; the respective birth weights of these groups were 0.81 and 0.38 sd below average compared with Flemish standards. Twenty-seven percent of such exaggerated adrenarche girls had subnormal birth weights for gestational age (SGA) (67). One French group obtained confirmatory results, finding birth weights of unselected girls with premature pubarche to be significantly lower than expected (74). However, no association between birth weight and premature pubarche was found in the above smaller Parisian cohort (73).

Healthy postmenarcheal Catalan girls without premature pubarche who were born SGA had DHEA-S levels twice as high as those with normal birth size (averaging 282 *vs.* 136  $\mu\text{g}/\text{dl}$ ) (75). A smaller group of Italian SGA girls evaluated at 6.0–7.5 yr of age were found to have 30% higher DHEA-S levels than matched controls, although pubarche had not occurred (76). However, their SGA group evaluated at 17.5–18.5 yr of age showed no significant DHEA-S elevation or clinical evidence of PCOS. A Dutch study showed significantly increased DHEA-S levels in SGA children before pu-

berty but loss of significance during puberty (77). A United Kingdom study revealed an inverse relationship between the birth size at term and mid-childhood DHEA-S level (78). Thus, these data confirm an association of early adrenarche with SGA but indicate that it may not be symptomatic or a harbinger of persistent adrenal hyperandrogenism in all populations.

Postmenarcheal follow-up of the Catalan exaggerated-adrenarche girls revealed that 52% were not hyperandrogenic, whereas 25% had the PCOS type of FOH without hyperinsulinemia during an oral glucose tolerance test and 23% had both FOH and hyperinsulinemia (65). The birth weights of these successive groups averaged 0.25, 1.0, and 2.0 sd below average. Thus, increasing degrees of intrauterine growth restriction seemed to be associated with successively increasing risk for premature adrenarche, PCOS, and hyperinsulinemia. Notably, LBW seemed to protect those who acquired PCOS from developing polycystic ovaries (79). The data were interpreted as consistent with the fetal-origins hypothesis that intrauterine growth restriction predisposes to postnatal insulin resistance, an association that is well established (80). In addition, the investigators postulated that premature pubarche and PCOS were likewise consequences of LBW-related insulin resistance and were, indeed, more sensitive markers of insulin resistance than diabetes.

However, follow-up of birth cohorts in other populations has not found a relationship of LBW to PCOS. Follow-up of a large 1950s British birth group to an average age of 27 yr showed no relationship of LBW to PCOS (26). Indeed, heavy babies whose mothers' weights were above average developed PCOS. Birth weight may also be correlated with the development of polycystic ovaries (26, 81). Study of a similar Finnish population showed no relationship of low birth weight to PCOS symptoms (82). The above Parisian investigators, who had found no relationship of LBW to premature pubarche, ascertained no relationship to late-pubertal hyperandrogenism (73) and found that young adult women born SGA did not have an increased prevalence of menstrual irregularity or higher androgen levels, although they were significantly insulin resistant, a predisposition that was independent of adiposity (83). Thus, although SGA predisposes to insulin resistance, it seems to pose less risk for premature pubarche or PCOS in most populations studied to date.

#### *Exaggerated adrenarche coexistent with central precocious puberty*

Lazar *et al.* (84) found an unexpectedly high (55%) prevalence of exaggerated adrenarche in Israeli girls with central precocious puberty (CPP), detected as 17-hydroxypregnenolone hyperresponsiveness ( $>750 \text{ ng}/\text{dl}$ ) to ACTH, at the start of puberty. The only clinical clue may have been the coincident onset of pubic hair with breast development because DHEA-S elevation was found in only a minority. They also found that about 40% of an older cohort of their CPP girls developed PCOS in the early postmenarcheal years and that this occurred exclusively in those who similarly had 17-hydroxypregnenolone and DHEA-S hyperresponsiveness to ACTH, *i.e.* functional adrenal hyperandrogenism (66). These data suggest a previously unrecognized relationship of a subtle form of exaggerated adrenarche, not detected by

DHEA-S, to PCOS. If confirmed longitudinally, the data would suggest that atypical CPP can be but the first manifestation of a disturbance that will eventually culminate in PCOS.

*Conclusions: relationship of premature pubarche and premature adrenarche to PCOS*

Premature pubarche is quite heterogeneous. That associated with exaggerated adrenarche appears to carry increased risk for PCOS. However, the extent of risk is unclear and may vary with the clinical and hormonal characteristics of the particular study population.

### Is Abnormal Hypothalamic-Pituitary-Ovarian Function Detectable in Early Childhood?

Activation of the hypothalamic-pituitary-gonadal axis, a process distinct from adrenarche, underlies true puberty, the first sign of which is breast development in girls. Abnormality of pituitary-ovarian function has been sought at presentation in girls with premature adrenarche, and none was found (85). There has been no follow-up of the predictive value of ovarian morphology for PCOS.

Premature (precocious) puberty, *i.e.* before 8 yr of age in girls (86–88), is due to early activation of the normal axis and is usually of unknown etiology, which is termed idiopathic CPP. It has been a prime candidate disorder because it resembles PCOS in being characterized by a disproportionate rise in LH relative to FSH. Case observations have prompted speculation that an underlying neuroendocrine dysfunction may be manifest first as CPP and later as PCOS (89). This possibility has been specifically addressed in three series of idiopathic CPP cases. PCOS occurred in about 10% of one European series (90), but it was not found in two others (52, 91). Thus, it is unclear whether the association with typical CPP is any more than would be expected by chance. Isolated reports suggest that PCOS may be associated with atypical CPP, however (66, 92).

Recently, spontaneous pituitary-ovarian function was studied in young daughters of PCOS patients at 2–3 months (during the mini-puberty of the newborn) and 4–7 yr of age (11). Significant elevation of anti-Müllerian hormone, a marker of granulosa cell function, was reported. However, only 18% had elevated levels, which is substantially less frequent than the prevalence of testosterone elevation (nearly 50%) in adult daughters of PCOS women (93). Pursuit of this line of investigation will be of interest.

### Prepubertal and Peripubertal Obesity

We recently recognized that intractable prepubertal obesity preceded severe insulin resistance syndromes that heralded adolescent PCOS in four cases (92). In two cases, the manifestation of insulin-resistant hyperinsulinism was pseudo-Cushing syndrome, diagnosed at 7.8 and 10.3 yr of age; in two, pseudo-acromegalic gigantism was recognized on presentation with tall stature at puberty. Notably, one of the pseudo-Cushing patients had developed CPP at 5.8 yr of age; this was atypical in being poorly suppressible by chronic GnRH agonist treatment. Three had an elevated basal index

of insulin resistance, and insulin rose to extremely high levels (1000–1800  $\mu\text{U}/\text{ml}$ ) during oral glucose tolerance testing (normal maximum, 500  $\mu\text{U}/\text{ml}$ ). The other was asymptotically diabetic in early puberty with peak insulin levels of 600–800  $\mu\text{U}/\text{ml}$  post glucose load. Acanthosis nigricans and metabolic syndrome were present in all. Polycystic ovaries were found in one case 2.5 yr before menarche. However, androgen excess could not be documented until menstrual irregularity developed after menarche at 10.8–12.8 yr of age. Three had a type 2 diabetic parent, one of whom had PCOS; ethnicity was diverse.

We suspect that these syndromic cases represent the tip of an iceberg that relates inborn insulin resistance to a predisposition to childhood obesity and PCOS. It remains to be determined to what extent more ordinary manifestations of insulin resistance, such as metabolic syndrome, a variably expressed cluster of central obesity, hyperglycemia, hypertension, and dyslipidemia that is the result of insulin resistance interacting with obesity and age, for which various childhood criteria have been proposed (25, 94, 95), are risk factors for PCOS.

Ordinary peripubertal obesity has been proposed to predispose to PCOS. Pre- and early-pubertal obese girls have been reported to have a subtle, subclinical increase in testosterone that normalizes with substantial weight loss (96, 97). Adipose tissue is known to be a major site for the formation of testosterone from circulating precursors (98). Because androgen excess inhibits progesterin negative feedback in adults, it has been speculated that the hyperandrogenemia of peripubertal obesity may result in increased LH secretion to enhance ovarian androgen production and progression to PCOS in susceptible girls (97).

An attempt to alter the outcome of girls at risk for PCOS by reversing their metabolic abnormalities has been undertaken by Ibañez *et al.* (99, 100). Insulin-lowering treatment with metformin was administered for 1 yr before or during puberty to LBW subgroups of Catalan premature pubarche girls. Metformin improved insulin resistance, adiposity, and features related to them as well as androgen levels, but the effects subsided promptly when treatment was discontinued.

### Physiological Adolescent Anovulation (PAA)

Half of menstrual cycles are anovulatory in the first two postmenarcheal years (101). PCOS is often overlooked because it masquerades as this PAA. About half of PAA girls have a PCOS-like increase in LH levels and LH pulse frequency; this group has significantly higher plasma testosterone than controls (102). Testosterone levels are elevated in most such cases, and once testosterone levels become elevated, they seldom normalize (103, 104). Most girls whose anovulatory symptoms persist more than 2 yr will have ongoing menstrual irregularity (105), so PCOS will account for a substantial proportion of these cases. Although elevation of plasma total or free testosterone provides firm supporting evidence for the hyperandrogenism of PCOS (6), their documentation may be difficult, often requiring determination by a specialty laboratory (5, 106).

PAA resembles PCOS in other ways as well. Normal puberty is characterized by insulin resistance and compensa-

tory hyperinsulinemia that seem to result from the transient pubertal increase in GH production (107–109). The insulin resistance of puberty is like that of PCOS in its degree and in its tissue selectivity (110). Although insulin is synergistic with gonadotropins in promoting ovarian androgen excess (7, 111), it may contribute to anovulation independently of androgen hypersecretion to some extent (112). For example, all maneuvers that lower insulin levels, from weight loss to drug treatment, have about a 50% probability of improving menstrual cyclicity and ovulatory status (113–116). Because plasma testosterone falls only modestly with these therapies, ovulation seems partly independent of normalization of androgen levels and directly attributable to lowered insulin resistance. The possibility that this physiological insulin resistance accounts for PAA is untested.

In addition, PAA resembles PCOS in ovarian anatomy. The normal adolescent ovary is known to histologically resemble a polycystic ovary (117, 118). The perimenarcheal combination of a high number of follicles and mature gonadotropin stimulation leads to a greater number of large antral follicles and a slightly greater ovarian size than at any other stage (22). Ultrasound imaging has shown that about one quarter of healthy adolescent volunteers develop multifollicular ovaries, defined as six to 10 follicles of 4–10 mm diameter in the maximum plane without increased ovarian stroma (119, 120). The distinction of these from polycystic ovaries is often difficult (104).

The prevalence of a polycystic ovary appears to be about 10% in the general population of regularly menstruating postmenarcheal schoolchildren (121). The presence of a polycystic ovary appears to have multiple congenital determinants; there is evidence for autosomal dominant transmission (22), linkage to paternal metabolic syndrome (25), and correlations with birth weight and length of gestation (26, 81). About 8% of asymptomatic adolescent volunteers with a polycystic-size ovary were found to have subclinical PCOS (22) and nearly half (42%) to have a subclinical PCOS type of ovarian dysfunction, secreting excessive 17PROG in response to GnRH agonist stimulation without having hyperandrogenemia (22). It is presently unclear whether the latter subgroup is heterozygous for a polycystic ovary gene or is at risk for developing symptomatic PCOS later.

### Summary and Conclusions

Identifying girls at risk for PCOS appears to be possible in some situations and offers the potential of eventually preventing some of the long-term complications associated with this syndrome. Nevertheless, more research is needed to increase the prepubertal ascertainment of risk.

CAH and other congenital virilizing disorders appear to be strong risk factors. Failure to correct hyperandrogenemia and normalize menses with glucocorticoid replacement therapy of CAH suggests the diagnosis of PCOS. Prenatal treatment of female fetuses with CAH may prove to prevent the complication of PCOS as well as improve genital anatomy.

SGA seems to pose increased risk for early adrenarche and insulin resistance but to pose less risk for postmenarcheal hyperandrogenism in most populations. In contrast, birth

size or gestational age may be related to the development of polycystic ovaries.

Premature pubarche patients appear to carry about a 15–20% risk of developing PCOS. It seems likely that the risk is relatively high in those with exaggerated adrenarche (indicated by, for example, DHEA-S 130–185  $\mu\text{g}/\text{dl}$ , androstenedione > 75–99 ng/dl, or post-ACTH 17-hydroxypregnenolone > 750 ng/dl) and relatively low in those with ordinary premature adrenarche (DHEA-S = 40–130  $\mu\text{g}/\text{dl}$ ) or idiopathic premature pubarche (DHEA-S < 40  $\mu\text{g}/\text{dl}$ ).

Atypical CPP may pose a risk for PCOS, although ordinary CPP does not appear to do so.

Insulin-resistant obesity in early childhood seems to be a PCOS risk factor. Extreme degrees of insulin resistance are indicated by pseudo-Cushing syndrome or pseudo-acromegaly. Whether ordinary peripubertal obesity predisposes to PCOS remains to be determined, but those with insulin resistance, manifested as acanthosis nigricans or metabolic syndrome or predisposed by family history, may be at particular risk.

Nearly half of adolescents in whom a polycystic ovary is incidentally discovered have a subclinical PCOS type of ovarian dysfunction. Assessment for hyperandrogenism seems reasonable, although most will not have PCOS, and the prognosis for most is unclear. A polycystic ovary is uncommon before menarche and so may be a high-risk factor.

During adolescence, PCOS may masquerade as PAA. There is a high probability of PCOS as the cause if anovulatory symptoms persist for more than 2 yr.

PCOS is a complex trait with a large hereditary component. Therefore, the presence of PCOS, polycystic ovaries, or central obesity, diabetes, or other insulin-resistant features in a parent should heighten the concern about risk for PCOS if the child presents other risk factors.

### Acknowledgments

Dr. Lourdes Ibañez is thanked for her helpful suggestions.

Received September 13, 2006. Accepted December 7, 2006.

Address all correspondence and requests for reprints to: Robert L. Rosenfield, M.D., The University of Chicago Pritzker School of Medicine, Department of Pediatrics, Section of Pediatric Endocrinology, The University of Chicago Comer Children's Hospital, 5841 South Maryland Avenue, MC-5053, Chicago, Illinois 60637. E-mail: robros@peds.bsd.uchicago.edu.

The author's research is supported in part by U.S. Public Health Service Grants U54-041859 and RR-000055.

Disclosure Statement: The author has nothing to disclose.

### References

1. Knochenhauer ES, Key TJ, Kahsar-Miller M, Waggoner W, Boots LR, Azziz R 1998 Prevalence of the polycystic ovary syndrome in unselected black and white women of the southeastern United States: a prospective study. *J Clin Endocrinol Metab* 83:3078–3082
2. Zawadzki J, Dunaif A 1992 Diagnostic criteria for polycystic ovary syndrome: towards a rational approach. In: Dunaif A, Givens J, Haseltine F, Merriam G, eds. *Polycystic ovary syndrome*. Cambridge, MA: Blackwell Scientific; 377–384
3. Rotterdam ESHRE/ASRM-Sponsored PCOS Consensus Workshop 2004 Revised 2003 consensus on diagnostic criteria and long-term health risks related to polycystic ovary syndrome. *Fertil Steril* 81:19–25
4. Dewailly D, Catteau-Jonard S, Reyss AC, Leroy M, Pigny P 2006 Oligoanovulation with polycystic ovaries but not overt hyperandrogenism [E-letter to the Editor: 13 November 2006]. *J Clin Endocrinol Metab* 91:3922–3927
5. Azziz R, Carmina E, Dewailly D, Diamanti-Kandarakis E, Escobar-Mor-

- reale HF, Futterweit W, Janssen OE, Legro RS, Norman RJ, Taylor AE, Witchel SF 2006 Criteria for defining polycystic ovary syndrome as a predominantly hyperandrogenic syndrome: an androgen excess society guideline. *J Clin Endocrinol Metab* 91:4237–4245
6. **Buggs C, Rosenfield RL** 2005 Polycystic ovary syndrome in adolescence. *Endocrinol Metab Clin North Am* 34:677–705
  7. **Ehrmann DA, Barnes RB, Rosenfield RL** 1995 Polycystic ovary syndrome as a form of functional ovarian hyperandrogenism due to dysregulation of androgen secretion. *Endocr Rev* 16:322–353
  8. **Rosenfield RL** 1999 Ovarian and adrenal function in polycystic ovary syndrome. *Endocrinol Metab Clin North Am* 28:265–293
  9. **Nelson VL, Legro RS, Strauss 3rd JF, McAllister JM** 1999 Augmented androgen production is a stable steroidogenic phenotype of propagated theca cells from polycystic ovaries. *Mol Endocrinol* 13:946–957
  10. **Stubbs SA, Hardy K, Da Silva-Buttkus P, Stark J, Webber LJ, Flanagan AM, Themmen AP, Visser JA, Groome NP, Franks S** 2005 Anti-mullerian hormone protein expression is reduced during the initial stages of follicle development in human polycystic ovaries. *J Clin Endocrinol Metab* 90:5536–5543
  11. **Sir-Petermann T, Codner E, Maliqueo M, Echiburu B, Hitschfeld C, Crisosto N, Perez-Bravo F, Recabarren SE, Cassola F** 2006 Increased anti-Mullerian hormone serum concentrations in prepubertal daughters of women with polycystic ovary syndrome. *J Clin Endocrinol Metab* 91:3105–3109
  12. **Ehrmann DA, Rosenfield RL, Barnes RB, Brigell DF, Sheikh Z** 1992 Detection of functional ovarian hyperandrogenism in women with androgen excess. *N Engl J Med* 327:157–162
  13. **Taylor AE, McCourt B, Martin KA, Anderson EJ, Adams JM, Schoenfeld D, Hall JE** 1997 Determinants of abnormal gonadotropin secretion in clinically defined women with polycystic ovary syndrome. *J Clin Endocrinol Metab* 82:2248–2256
  14. **Eagleson CA, Gingrich MB, Pastor CL, Arora TK, Burt CM, Evans WS, Marshall JC** 2000 Polycystic ovarian syndrome: evidence that flutamide restores sensitivity of the gonadotropin-releasing hormone pulse generator to inhibition by estradiol and progesterone. *J Clin Endocrinol Metab* 85:4047–4052
  15. **Pielecka J, Quaynor SD, Moenter SM** 2006 Androgens increase gonadotropin-releasing hormone neuron firing activity in females and interfere with progesterone negative feedback. *Endocrinology* 147:1474–1479
  16. **Chhabra S, McCartney CR, Yoo RY, Eagleson CA, Chang RJ, Marshall JC** 2005 Progesterone inhibition of the hypothalamic gonadotropin-releasing hormone pulse generator: evidence for varied effects in hyperandrogenic adolescent girls. *J Clin Endocrinol Metab* 90:2810–2815
  17. **Barnes RB, Rosenfield RL, Ehrmann DA, Cara JF, Cuttler L, Levitsky LL, Rosenthal IM** 1994 Ovarian hyperandrogenism as a result of congenital adrenal virilizing disorders: evidence for perinatal masculinization of neuroendocrine function in women. *J Clin Endocrinol Metab* 79:1328–1333
  18. **Ghizzoni L, Virdis R, Vottero A, Cappa M, Street ME, Zampolli M, Ibañez L, Bernasconi S** 1996 Pituitary-ovarian responses to leuprolide acetate testing in patients with congenital adrenal hyperplasia due to 21-hydroxylase deficiency. *J Clin Endocrinol Metab* 81:601–606
  19. **Legro RS, Strauss JF** 2002 Molecular progress in infertility: polycystic ovary syndrome. *Fertil Steril* 78:569–576
  20. **Escobar-Morreale HF, Luque-Ramirez M, San Millan JL** 2005 The molecular-genetic basis of functional hyperandrogenism and the polycystic ovary syndrome. *Endocr Rev* 26:251–282
  21. **Vink JM, Sadrzadeh S, Lambalk CB, Boomsma DI** 2006 Heritability of polycystic ovary syndrome in a Dutch twin-family study. *J Clin Endocrinol Metab* 91:2100–2104
  22. **Mortensen M, Rosenfield R, Littlejohn E** 2006 Functional significance of polycystic-size ovaries in healthy adolescents. *J Clin Endocrinol Metab* 91:3786–3790
  23. **Barber TM, McCarthy MI, Wass JA, Franks S** 2006 Obesity and polycystic ovary syndrome. *Clin Endocrinol (Oxf)* 65:137–145
  24. **Poretsky L** 2006 Polycystic ovary syndrome: increased or preserved ovarian sensitivity to insulin? *J Clin Endocrinol Metab* 91:2859–2860
  25. **Leibel NI, Baumann EE, Kocherginsky M, Rosenfield RL** 2006 Relationship of adolescent polycystic ovary syndrome to parental metabolic syndrome. *J Clin Endocrinol Metab* 91:1275–1283
  26. **Cresswell JL, Barker DJ, Osmond C, Egger P, Phillips DI, Fraser RB** 1997 Fetal growth, length of gestation, and polycystic ovaries in adult life. *Lancet* 350:1131–1135
  27. **Abbott DH, Barnett DK, Bruns CM, Dumesic DA** 2005 Androgen excess fetal programming of female reproduction: a developmental aetiology for polycystic ovary syndrome? *Hum Reprod Update* 11:357–374
  28. **Zachmann M, Manella B, Kempken B, Knorr-Muerset G, Atares M, Prader A** 1984 Ovarian steroidogenesis in an adrenalectomized girl with 21-hydroxylase deficiency. *Clin Endocrinol (Oxf)* 21:575–582
  29. **Speiser PW, Serrat J, New MI, Gertner JM** 1992 Insulin insensitivity in adrenal hyperplasia due to nonclassical steroid 21-hydroxylase deficiency. *J Clin Endocrinol Metab* 75:1421–1424
  30. **Lucis O, Hobkirk R, Hollenberg C, MacDonald S, Blahey P** 1966 Polycystic ovaries associated with congenital adrenal hyperplasia. *Can Med Assoc J* 94:1–7
  31. **Hague WM, Adams J, Rodda C, Brook CG, de Bruyn R, Grant DB, Jacobs HS** 1990 The prevalence of polycystic ovaries in patients with congenital adrenal hyperplasia and their close relatives. *Clin Endocrinol (Oxf)* 33:501–510
  32. **Dewailly D, Vantyghem-Haudiquet MC, Sainsard C, Buvat J, Cappoen JP, Ardaens K, Racadot A, Lefebvre J, Fossati P** 1986 Clinical and biological phenotypes in late-onset 21-hydroxylase deficiency. *J Clin Endocrinol Metab* 63:418–423
  33. **Feldman S, Billaud L, Thalabard JC, Raux-Demay MC, Mowszowicz J, Kuttann F, Mauvais-Jarvis P** 1992 Fertility in women with late-onset adrenal hyperplasia due to 21-hydroxylase deficiency. *J Clin Endocrinol Metab* 74:635–639
  34. **Levin J, Carmina E, Lobo R** 1991 Is the inappropriate gonadotropin secretion of patients with polycystic ovary syndrome similar to that of patients with adult-onset congenital adrenal hyperplasia? *Fertil Steril* 56:635–640
  35. **Mulaikal R, Migeon C, Rock J** 1987 Fertility rates in female patients with congenital adrenal hyperplasia due to 21-hydroxylase deficiency. *N Engl J Med* 316:178–182
  36. **Kaltsas GA, Korbonits M, Isidori AM, Webb JA, Trainer PJ, Monson JP, Besser GM, Grossman AB** 2000 How common are polycystic ovaries and the polycystic ovarian syndrome in women with Cushing's syndrome? *Clin Endocrinol (Oxf)* 53:493–500
  37. **Sullivan SD, Moenter SM** 2004 Prenatal androgens alter GABAergic drive to gonadotropin-releasing hormone neurons: implications for a common fertility disorder. *Proc Natl Acad Sci USA* 101:7129–7134
  38. **Sarma HN, Manikkam M, Herkimer C, Dell'Orco J, Welch KB, Foster DL, Padmanabhan V** 2005 Fetal programming: excess prenatal testosterone reduces postnatal luteinizing hormone, but not follicle-stimulating hormone responsiveness, to estradiol negative feedback in the female. *Endocrinology* 146:4281–4291
  39. **Zhou R, Bird IM, Dumesic DA, Abbott DH** 2005 Adrenal hyperandrogenism is induced by fetal androgen excess in a rhesus monkey model of polycystic ovary syndrome. *J Clin Endocrinol Metab* 90:6630–6637
  40. **Cole B, Hensinger K, Maciel GA, Chang RJ, Erickson GF** 2006 Human fetal ovary development involves the spatiotemporal expression of p450c17 protein. *J Clin Endocrinol Metab* 91:3654–3661
  41. **Sir-Petermann T, Maliqueo M, Angel B, Lara HE, Perez-Bravo F, Recabarren SE** 2002 Maternal serum androgens in pregnant women with polycystic ovarian syndrome: possible implications in prenatal androgenization. *Hum Reprod* 17:2573–2579
  42. **Wudy SA, Wachter UA, Homoki J, Teller WM** 1995 17 $\alpha$ -Hydroxyprogesterone, 4-androstenedione, and testosterone profiled by routine stable isotope dilution/gas chromatography-mass spectrometry in plasma of children. *Pediatr Res* 38:76–80
  43. **Ibañez L, Dimartino-Nardi J, Potau N, Saenger P** 2000 Premature adrenarche: normal variant or forerunner of adult disease? *Endocr Rev* 21:671–696
  44. **Auchus RJ, Rainey WE** 2004 Adrenarche: physiology, biochemistry and human disease. *Clin Endocrinol (Oxf)* 60:288–296
  45. **Silverman SH, Migeon C, Roseberry E, Wilkins L** 1952 Precocious growth of sexual hair without other secondary sexual development: premature pubarche, a constitutional variation of adolescence. *Pediatrics* 10:426–432
  46. **Rosenfield RL** 1971 Plasma 17-ketosteroids and 17 $\beta$ -hydroxysteroids in girls with premature development of sexual hair. *J Pediatr* 79:260–266
  47. **Korth-Schutz S, Levine LS, New MI** 1976 Serum androgens in normal prepubertal and pubertal children and in children with precocious adrenarche. *J Clin Endocrinol Metab* 42:117–124
  48. **de Peretti E, Forest MG** 1978 Pattern of plasma dehydroepiandrosterone sulfate levels in humans from birth to adulthood: evidence for testicular production. *J Clin Endocrinol Metab* 47:572–577
  49. **Rich BH, Rosenfield RL, Lucky AW, Helke JC, Otto P** 1981 Adrenarche: changing adrenal response to adrenocorticotropin. *J Clin Endocrinol Metab* 52:1129–1134
  50. **Taha D, Mullis PE, Ibañez L, de Zegher F** 2005 Absent or delayed adrenarche in Pit-1/POU1F1 deficiency. *Horm Res* 64:175–179
  51. **Smith C, Dunger D, Williams A, Taylor A, Perry L, Gale E, Preece M, Savage M** 1989 Relationship between insulin, insulin-like growth factor I, and dehydroepiandrosterone sulfate concentrations during childhood, puberty, and adult life. *J Clin Endocrinol Metab* 68:932
  52. **Palmert MR, Hayden DL, Mansfield MJ, Crigler Jr JF, Crowley Jr WF, Chandler DW, Boepple PA** 2001 The longitudinal study of adrenal maturation during gonadal suppression: evidence that adrenarche is a gradual process. *J Clin Endocrinol Metab* 86:4536–4542
  53. **Biason-Lauber A, Zachmann M, Schoenle EJ** 2000 Effect of leptin on CYP17 enzymatic activities in human adrenal cells: new insight in the onset of adrenarche. *Endocrinology* 141:1446–1454
  54. **Guercio G, Rivarola MA, Chaler E, Maceiras M, Belgorosky A** 2003 Relationship between the growth hormone/insulin-like growth factor-I axis, insulin sensitivity, and adrenal androgens in normal prepubertal and pubertal girls. *J Clin Endocrinol Metab* 88:1389–1393
  55. **Rosenfield RL, Fang VS, Dupon C, Kim MH, Refetoff S** 1973 The effects of



- low doses of depot estradiol and testosterone in teenagers with ovarian failure and Turner's syndrome. *J Clin Endocrinol Metab* 37:574–580
56. **Rosenfield RL** 1994 Normal and almost normal variants of precocious puberty. Premature pubarche and premature thelarche revisited. *Horm Res* 41(Suppl 2):7–13
  57. **Rosenfield RL, Rich BH, Lucky AW** 1982 Adrenarche as a cause of benign pseudopuberty in boys. *J Pediatr* 101:1005–1009
  58. **Rosenfield RL** 2005 Hirsutism and the variable response of the pilosebaceous unit to androgen. *J Invest Dermatol Symp Proc* 10:205–208
  59. **Lucky AW, Rosenfield RL, McGuire J, Rudy S, Helke J** 1986 Adrenal androgen hyperresponsiveness to ACTH in women with acne and/or hirsutism: adrenal enzyme defects and exaggerated adrenarche. *J Clin Endocrinol Metab* 62:840–848
  60. **Lashansky G, Saenger P, Fishman K, Gautier T, Mayes D, Berg G, Di Martino-Nardi J, Reiter E** 1991 Normative data for adrenal steroidogenesis in a healthy pediatric population: age- and sex-related changes after adrenocorticotropin stimulation. *J Clin Endocrinol Metab* 73:674–686
  61. **Ibañez L, Potau N, Virdis R, Zampolli M, Terzi C, Gussinye M, Carrascosa A, Vicens-Calvet E** 1993 Postpubertal outcome in girls diagnosed of premature pubarche during childhood: increased frequency of functional ovarian hyperandrogenism. *J Clin Endocrinol Metab* 76:1599–1603
  62. **Likitmaskul S, Cowell CT, Donaghy K, Kreutzmann DJ, Howard NJ, Blades B, Silink M** 1995 'Exaggerated adrenarche' in children presenting with premature adrenarche. *Clin Endocrinol (Oxf)* 42:265–272
  63. **Yen S** 1980 The polycystic ovary syndrome. *Clin Endocrinol (Oxf)* 12:177–208
  64. **Barnes RL, Ehrmann DA, Brigell DF, Rosenfield RL** 1993 Ovarian steroidogenic responses to the gonadotropin-releasing hormone agonist nafarelin in hirsute women thought to have  $\beta$ -hydroxysteroid dehydrogenase deficiency. *J Clin Endocrinol Metab* 76:450–455
  65. **Ibañez L, Potau N, Francois I, deZegher F** 1998 Precocious pubarche, hyperinsulinism, and ovarian hyperandrogenism: relation to reduced fetal growth. *J Clin Endocrinol Metab* 83:3558–3562
  66. **Lazar L, Kauli R, Bruchis C, Nordenberg J, Galatzer A, Pertzalan A** 1995 Early polycystic ovary-like syndrome in girls with central precocious puberty and exaggerated adrenal response. *Eur J Endocrinol* 133:403–406
  67. **Ibañez L, Jimenez R, de Zegher F** 2006 Early puberty-menarche after precocious pubarche: relation to prenatal growth. *Pediatrics* 117:117–121
  68. **Ibañez L, Potau N, Zampolli M, Street ME, A C** 1997 Girls diagnosed with premature pubarche show an exaggerated ovarian androgen synthesis from the early stages of puberty: evidence from gonadotropin-releasing hormone agonist testing. *Fertil Steril* 67:849–855
  69. **Ibañez L, Potau N, Zampolli M, Rique S, Saenger P, Carrascosa A** 1997 Hyperinsulinemia and decreased insulin-like growth factor-binding protein-1 are common features in prepubertal and pubertal girls with a history of premature pubarche. *J Clin Endocrinol Metab* 82:2283–2288
  70. **Ibañez L, Potau N, Chacon P, Pascual C, Carrascosa A** 1998 Hyperinsulinemia, dyslipaemia and cardiovascular risk in girls with a history of premature pubarche. *Diabetologia* 41:1057–1063
  71. **Ibañez L, Ong K, de Zegher F, Marcos MV, del Rio L, Dunger DB** 2003 Fat distribution in non-obese girls with and without precocious pubarche: central adiposity related to insulinaemia and androgenaemia from prepuberty to postmenarche. *Clin Endocrinol (Oxf)* 58:372–379
  72. **Vuguin P, Linder B, Rosenfeld RG, Saenger P, DiMartino-Nardi J** 1999 The roles of insulin sensitivity, insulin-like growth factor I (IGF-I), and IGF-binding protein-1 and -3 in the hyperandrogenism of African-American and Caribbean Hispanic girls with premature adrenarche. *J Clin Endocrinol Metab* 84:2037–2042
  73. **Meas T, Chevenne D, Thibaud E, Leger J, Cabrol S, Czernichow P, Levy-Marchal C** 2002 Endocrine consequences of premature pubarche in postpubertal Caucasian girls. *Clin Endocrinol (Oxf)* 57:101–106
  74. **Charkalak ML, Trivin C, Brauner R** 2004 Premature pubarche as an indicator of how body weight influences the onset of adrenarche. *Eur J Pediatr* 163: 89–93
  75. **Ibañez L, Potau N, Marcos MV, de Zegher F** 1999 Exaggerated adrenarche and hyperinsulinism in adolescent girls born small for gestational age. *J Clin Endocrinol Metab* 84:4739–4741
  76. **Ghirri P, Bernardini M, Vuerich M, Cuttano AM, Coccoli L, Merusi I, Ciulli C, D'Accavio L, Bottone U, Boldrini A** 2001 Adrenarche, pubertal development, age at menarche and final height of full-term, born small for gestational age (SGA) girls. *Gynecol Endocrinol* 15:91–97
  77. **Veening MA, van Weissenbruch MM, Roord JJ, de Delemarre-van Waal HA** 2004 Pubertal development in children born small for gestational age. *J Pediatr Endocrinol Metab* 17:1497–1505
  78. **Ong KK, Potau N, Petry CJ, Jones R, Ness AR, Honour JW, de Zegher F, Ibañez L, Dunger DB** 2004 Opposing influences of prenatal and postnatal weight gain on adrenarche in normal boys and girls. *J Clin Endocrinol Metab* 89:2647–2651
  79. **Ibañez L, Jaramillo A, Enriquez G, Miro E, Lopez-Bermejo A, Dunger D, de Zegher F** 2007 Polycystic ovaries after precocious pubarche: relation to prenatal growth. *Hum Reprod* 22:395–400
  80. **Barker DJ, Eriksson JG, Forsen T, Osmond C** 2002 Fetal origins of adult disease: strength of effects and biological basis. *Int J Epidemiol* 31:1235–1239
  81. **Michelmores K, Ong K, Mason S, Bennett S, Perry L, Vessey M, Balen A, Dunger D** 2001 Clinical features in women with polycystic ovaries: relationships to insulin sensitivity, insulin gene VNTR and birth weight. *Clin Endocrinol (Oxf)* 55:439–446
  82. **Laitinen J, Taponen S, Martikainen H, Pouta A, Millwood I, Hartikainen AL, Ruokonen A, Sovio U, McCarthy MI, Franks S, Jarvelin MR** 2003 Body size from birth to adulthood as a predictor of self-reported polycystic ovary syndrome symptoms. *Int J Obes Relat Metab Disord* 27:710–715
  83. **Jaquet D, Leger J, Chevenne D, Czernichow P, Levy-Marchal C** 1999 Intrauterine growth retardation predisposes to insulin resistance but not to hyperandrogenism in young women. *J Clin Endocrinol Metab* 84:3945–3949
  84. **Lazar L, Kauli R, Bruchis C, Nordenberg J, Galatzer A, Pertzalan A** 1995 High prevalence of abnormal adrenal response in girls with central precocious puberty at early pubertal stages. *Eur J Endocrinol* 133:407–411
  85. **Mathew RP, Najjar JL, Lorenz RA, Mayes DE, Russell WE** 2002 Premature pubarche in girls is associated with functional adrenal but not ovarian hyperandrogenism. *J Pediatr* 141:91–98
  86. **Rosenfield RL, Bachrach LK, Chernauek SD, Gertner JM, Gottschalk M, Hardin DS, Pescovitz OH, Saenger P** 2000 Current age of onset of puberty. *Pediatrics* 106:622
  87. **Wang Y** 2002 Is obesity associated with early sexual maturation? A comparison of the association in American boys versus girls. *Pediatrics* 110:903–910
  88. **Midyett LK, Moore WV, Jacobson JD** 2003 Are pubertal changes in girls before age 8 benign? *Pediatrics* 111:47–51
  89. **Root AW, Moshang Jr T** 1984 Evolution of the hyperandrogenism-polycystic ovary syndrome from isosexual precocious puberty: report of two cases. *Am J Obstet Gynecol* 149:763–767
  90. **Cisternino M, Pasquino A, Bozzola M, Balducci R, Lorini R, Pucarelli I, Segni M, Severi F** 1992 Final height attainment and gonadal function in girls with precocious puberty treated with cyproterone acetate. *Horm Res* 37:86–90
  91. **Jensen AM, Brocks V, Holm K, Laursen EM, Muller J** 1998 Central precocious puberty in girls: internal genitalia before, during, and after treatment with long-acting gonadotropin-releasing hormone analogues. *J Pediatr* 132: 105–108
  92. **Littlejohn E, Weiss R, Deplewski D, Edidin DV, Rosenfield RL** 2007 Intractable early childhood obesity as the initial sign of insulin resistant hyperinsulinism and precursor of polycystic ovary syndrome. *J Pediatr Endocrinol Metab* 20:41–51
  93. **Legro RS, Driscoll D, Strauss 3rd JF, Fox J, Dunaif A** 1998 Evidence for a genetic basis for hyperandrogenemia in polycystic ovary syndrome. *Proc Natl Acad Sci USA* 95:14956–14960
  94. **Cruz ML, Weigensberg MJ, Huang TT, Ball G, Shaibi GQ, Goran MI** 2004 The metabolic syndrome in overweight Hispanic youth and the role of insulin sensitivity. *J Clin Endocrinol Metab* 89:108–113
  95. **Weiss R, Dziura J, Burgert TS, Tamborlane WV, Taksali SE, Yeckel CW, Allen K, Lopes M, Savoye M, Morrison J, Sherwin RS, Caprio S** 2004 Obesity and the metabolic syndrome in children and adolescents. *N Engl J Med* 350:2362–2374
  96. **Reinehr T, de Sousa G, Roth CL, Andler W** 2005 Androgens before and after weight loss in obese children. *J Clin Endocrinol Metab* 90:5588–5595
  97. **McCartney CR, Prendergast KA, Chhabra S, Eagleson CA, Yoo R, Chang RJ, Foster CM, Marshall JC** 2006 The association of obesity and hyperandrogenemia during the pubertal transition in girls: obesity as a potential factor in the genesis of postpubertal hyperandrogenism. *J Clin Endocrinol Metab* 91:1714–1722
  98. **Kershaw EE, Flier JS** 2004 Adipose tissue as an endocrine organ. *J Clin Endocrinol Metab* 89:2548–2556
  99. **Ibañez L, Ferrer A, Ong K, Amin R, Dunger D, de Zegher F** 2004 Insulin sensitization early after menarche prevents progression from precocious pubarche to polycystic ovary syndrome. *J Pediatr* 144:23–29
  100. **Ibañez L, Valls C, Marcos MV, Ong K, Dunger DB, de Zegher F** 2004 Insulin sensitization for girls with precocious pubarche and with risk for polycystic ovary syndrome: effects of prepubertal initiation and postpubertal discontinuation of metformin treatment. *J Clin Endocrinol Metab* 89:4331–4337
  101. **Apter D, Vihko R** 1977 Serum pregnenolone, progesterone, 17-hydroxyprogesterone, testosterone, and 5 $\alpha$ -dihydrotestosterone during female puberty. *J Clin Endocrinol Metab* 45:1039–1048
  102. **Venturoli S, Porcu E, Fabbri R, Magrini O, Gammi L, Paradisi R, Flamigni C** 1992 Longitudinal evaluation of the different gonadotropin pulsatile patterns in anovulatory cycles of young girls. *J Clin Endocrinol Metab* 74:836–841
  103. **Venturoli S, Porcu E, Fabbri R, Paradisi R, Ruggeri S, Bolelli G, Orsini L, Gabbi D, Flamigni C** 1986 Menstrual irregularities in adolescents: hormonal pattern and ovarian morphology. *Horm Res* 24:269–279
  104. **Venturoli S, Porcu E, Fabbri R, Pluchinotta V, Ruggeri S, Macrelli S, Paradisi R, Flamigni C** 1995 Longitudinal change of sonographic ovarian aspects and endocrine parameters in irregular cycles of adolescence. *Pediatr Res* 38:974–980
  105. **Southam A, Richart E** 1966 The prognosis for adolescents with menstrual abnormalities. *Am J Obstet Gynecol* 94:637
  106. **Rosenfield RL** 2005 Clinical practice. Hirsutism. *N Engl J Med* 353:2578–2588
  107. **Caprio S, Jones T, Tamborlane W** 1994 Developmental changes in insulin

- action and secretion in childhood health and disease. *Adv Endocrinol Metab* 5:171–201
108. **Clark PA, Rogol AD** 1996 Growth hormones and sex steroid interactions at puberty. *Endocrinol Metab Clin North Am* 25:665–682
  109. **Moran A, Jacobs Jr DR, Steinberger J, Hong CP, Prineas R, Luepker R, Sinaiko AR** 1999 Insulin resistance during puberty: results from clamp studies in 357 children. *Diabetes* 48:2039–2044
  110. **Amiel SA, Caprio S, Sherwin RS, Plewe G, Haymond MW, Tamborlane WV** 1991 Insulin resistance of puberty: a defect restricted to peripheral glucose metabolism. *J Clin Endocrinol Metab* 72:277–282
  111. **Cara JF, Rosenfield RL** 1988 Insulin-like growth factor-I and insulin potentiate luteinizing hormone-induced androgen synthesis by rat ovarian theca-interstitial cells. *Endocrinology* 123:733–739
  112. **Franks S** 2006 Controversy in clinical endocrinology: diagnosis of polycystic ovarian syndrome: in defense of the Rotterdam criteria. *J Clin Endocrinol Metab* 91:786–789
  113. **Barbieri RL** 2003 Metformin for the treatment of polycystic ovary syndrome. *Obstet Gynecol* 101:785–793
  114. **Norman RJ, Noakes M, Wu R, Davies MJ, Moran L, Wang JX** 2004 Improving reproductive performance in overweight/obese women with effective weight management. *Hum Reprod Update* 10:267–280
  115. **Baillargeon JP, Jakubowicz DJ, Iuorno MJ, Jakubowicz DJ, Nestler JE** 2004 Effects of metformin and rosiglitazone, alone and in combination, in nonobese women with polycystic ovary syndrome and normal indices of insulin sensitivity. *Fertil Steril* 82:893–902
  116. **Eisenhardt S, Schwarzmann N, Henschel V, Germeyer A, von Wolff M, Hamann A, Strowitzki T** 2006 Early effects of metformin in women with polycystic ovary syndrome: a prospective randomized, double-blind, placebo-controlled trial. *J Clin Endocrinol Metab* 91:946–952
  117. **Polhemus D** 1953 Ovarian maturation and cyst formation in children. *Pediatr* 11:588–593
  118. **Merrill JA** 1963 The morphology of the prepubertal ovary: relationship to the polycystic ovary syndrome. *South Med J* 56:225–231
  119. **Brook C, Jacobs H, Stanhope R** 1988 Polycystic ovaries in childhood. *Br Med J* 296:878
  120. **Adams J, Franks S, Polson DW, Mason HD, Abdulwahid NA, Tucker M, Morris DV, Price J, Jacobs HS** 1985 Multifollicular ovaries: clinical and endocrine features and response to pulsatile gonadotrophin releasing hormone. *Lancet* 2:1375–1378
  121. **van Hooff MH, Voorhorst FJ, Kaptein MB, Hirasing RA, Koppenaal C, Schoemaker J** 2000 Polycystic ovaries in adolescents and the relationship with menstrual cycle patterns, luteinizing hormone, androgens, and insulin. *Fertil Steril* 74:49–58

JCEM is published monthly by The Endocrine Society (<http://www.endo-society.org>), the foremost professional society serving the endocrine community.
